# Supplementary material for: The caffeic acid moiety plays an essential role in attenuating lipid accumulation by chlorogenic acid and its analogues
Source: Royal Society of Chemistry journal article supplement (doi:10.1039/c8ra09395d), 2019-01-01
Supplement: c8ra09395d1.pdf [file c8ra09395d1.pdf]

**Caffeic acid moiety plays an essential role in attenuating lipid accumulation by chlorogenic acid  
and its derivatives**

Xiaoxue Cao,<sup>a,†</sup> Chongming Wu,<sup>a,†</sup> Yu Tian,<sup>\*,a</sup> and Peng Guo<sup>\*,a</sup>

<sup>a</sup> Institute of Medicinal Plant Development, Chinese Academy of Medical Sciences & Peking Union

Medical College, Beijing 100193, China

\* Correspondence: ytian@implad.ac.cn (Y.T.); pguo@implad.ac.cn (P.G.); Tel.: +86-10-5783-3235

(Y.T. & P.G.).

† These authors contributed equally to this work.

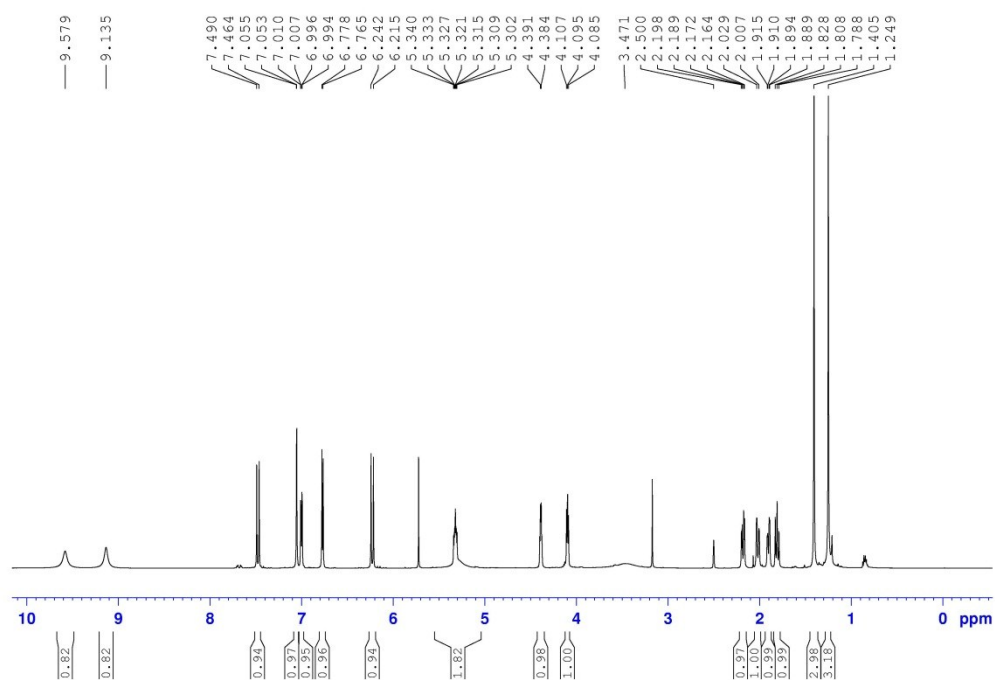

$^1\text{H}$  NMR of compound 4

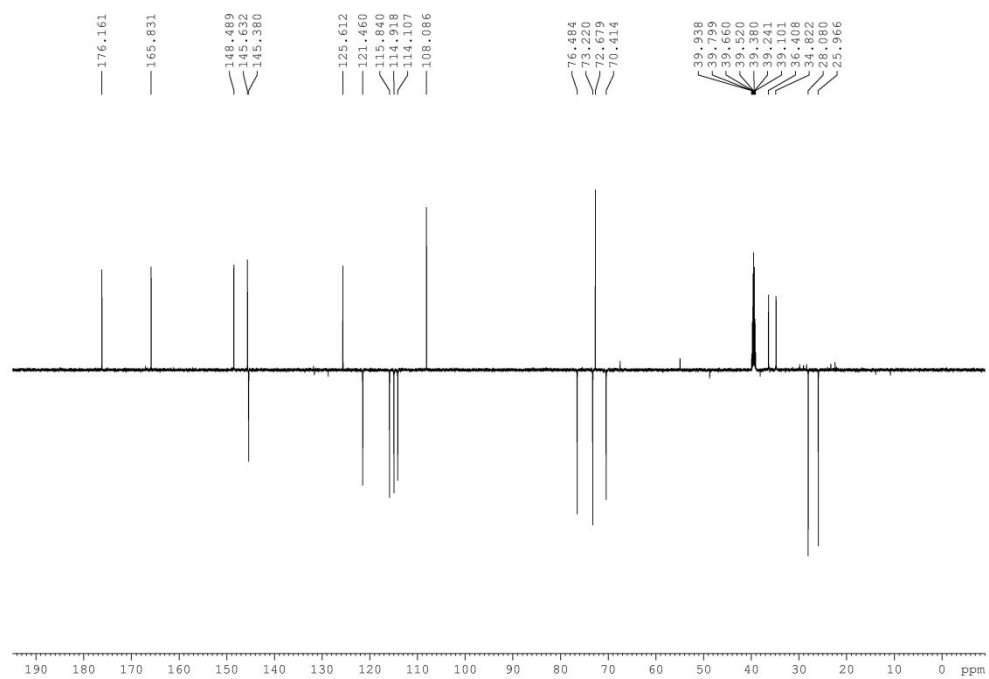

$^{13}\text{C}$  NMR of compound 4

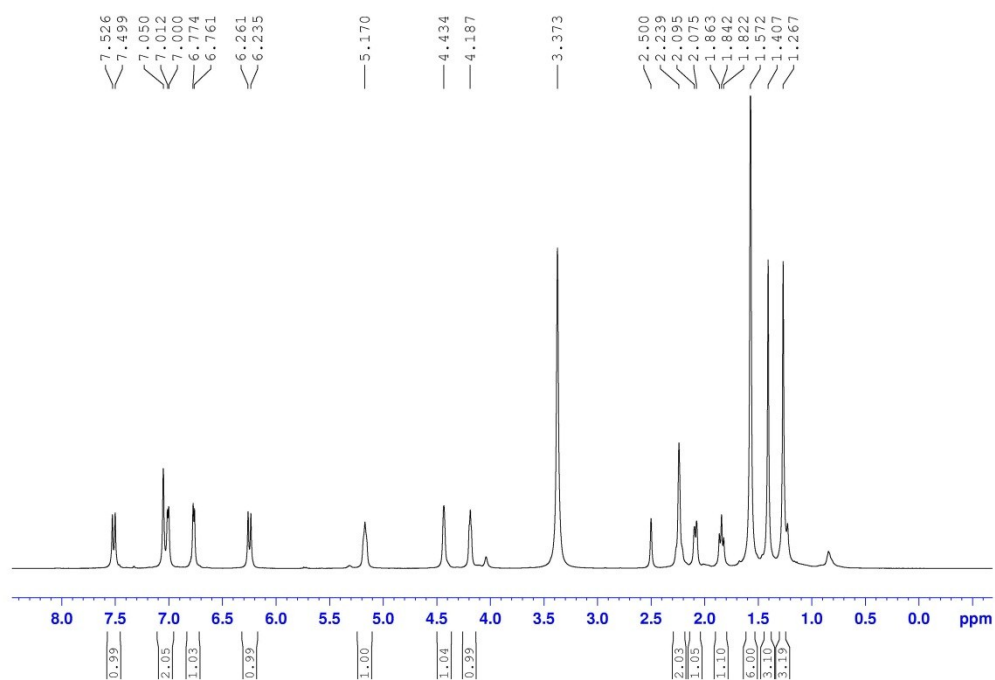

$^1\text{H}$  NMR of compound **5**

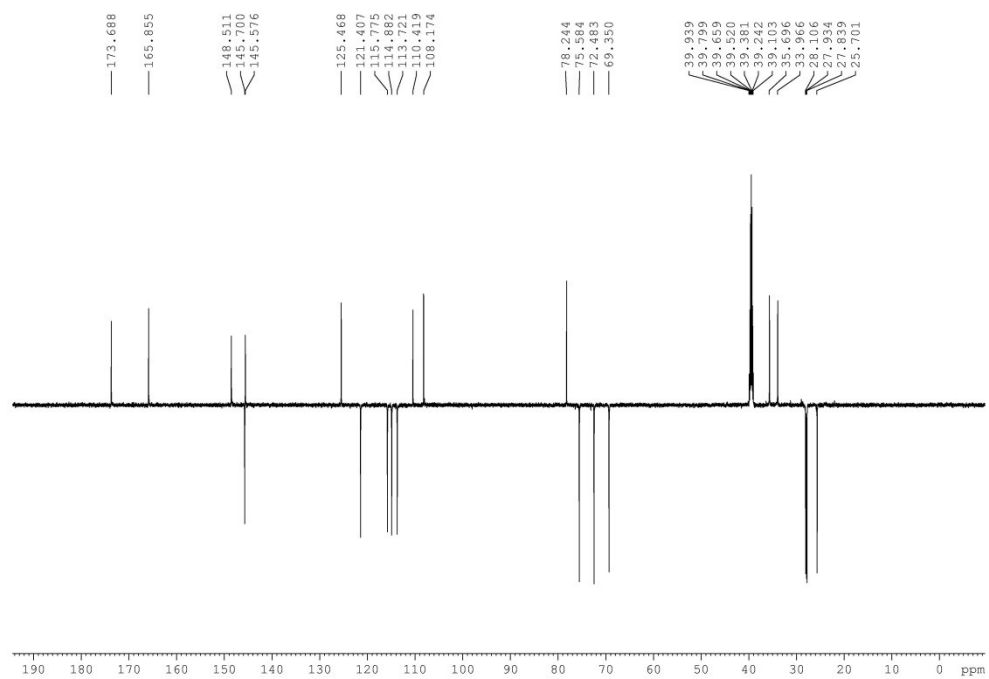

$^{13}\text{C}$  NMR of compound **5**

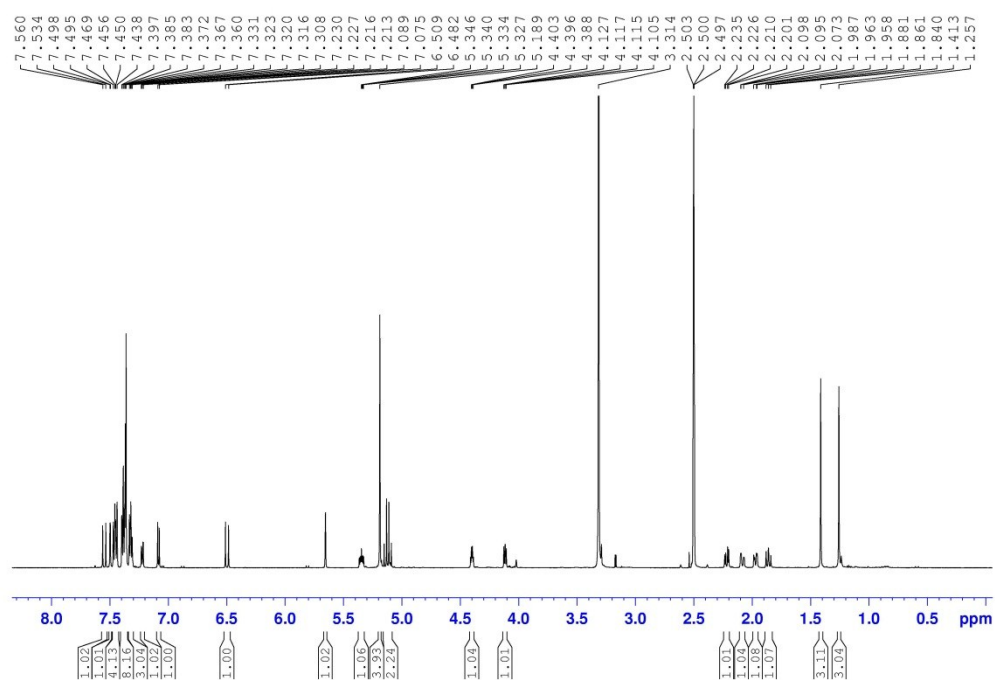

<sup>1</sup>H NMR of compound 6

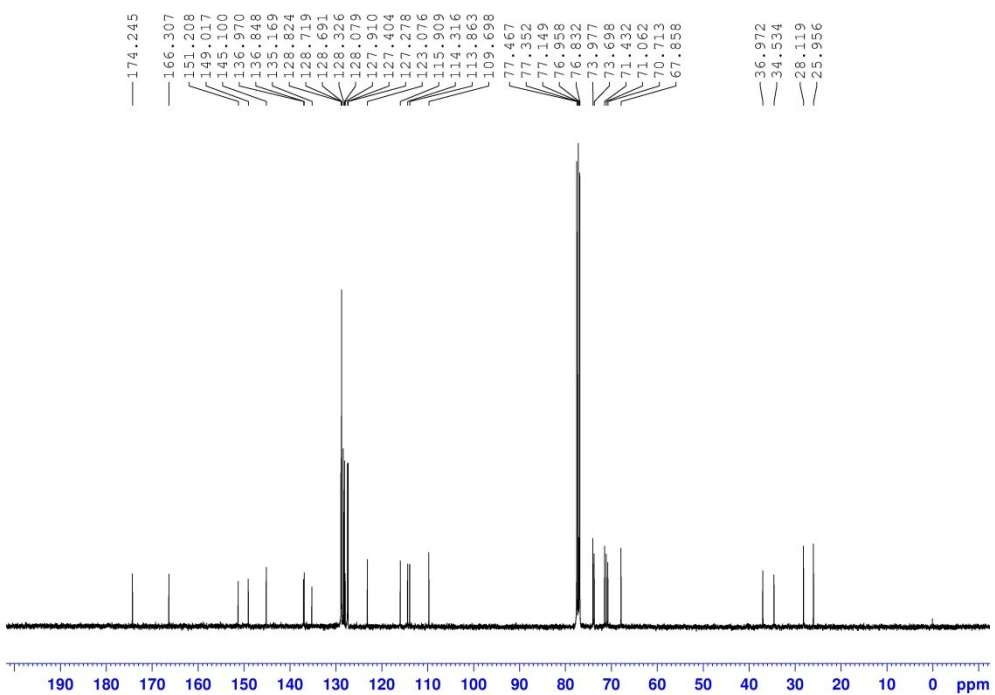

<sup>13</sup>C NMR of compound 6

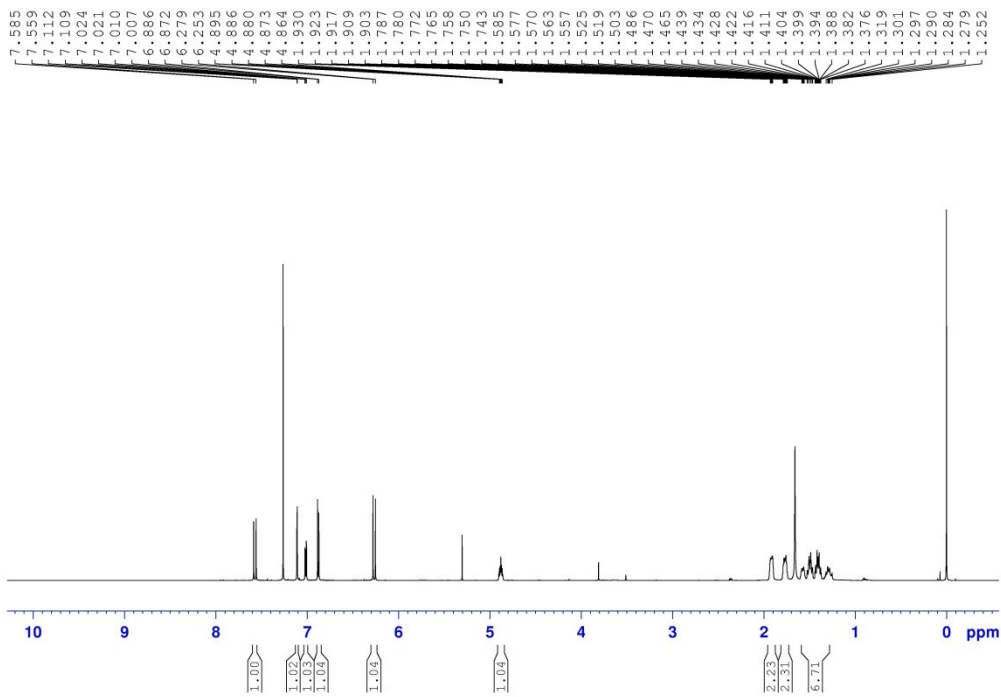

<sup>1</sup>H NMR of compound **11**

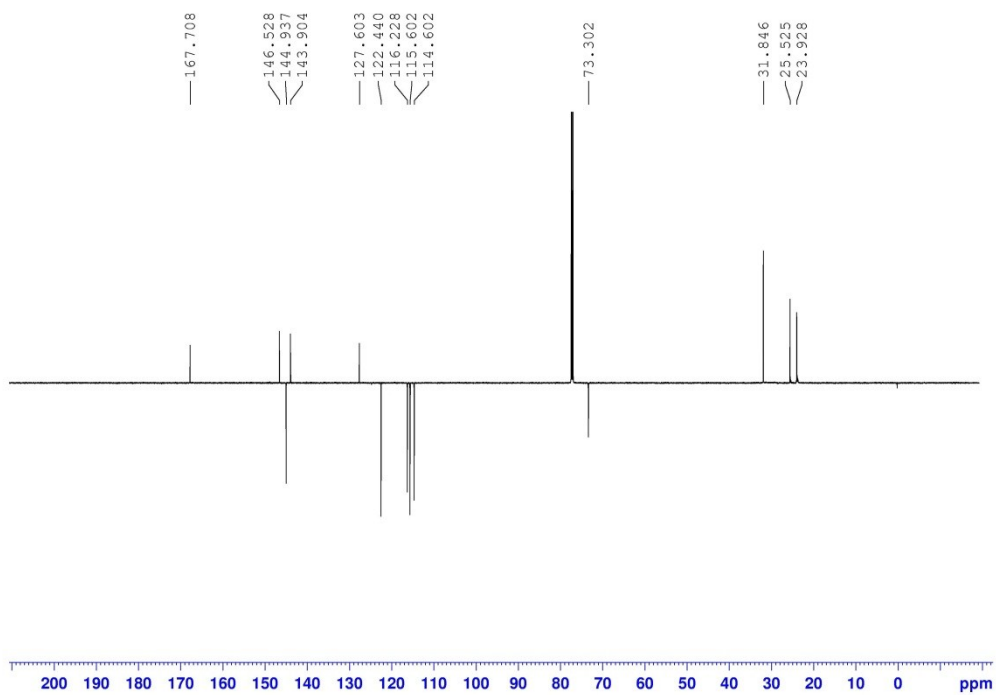

<sup>13</sup>C NMR of compound **11**

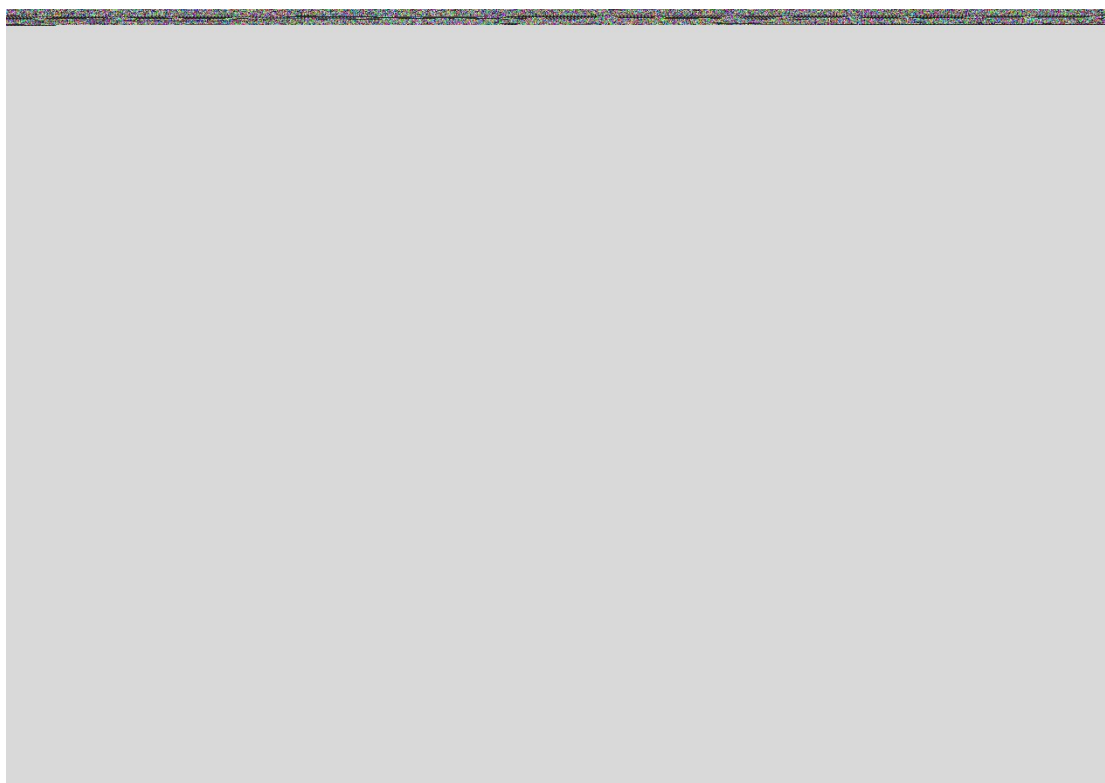

<sup>1</sup>H NMR of compound **12**

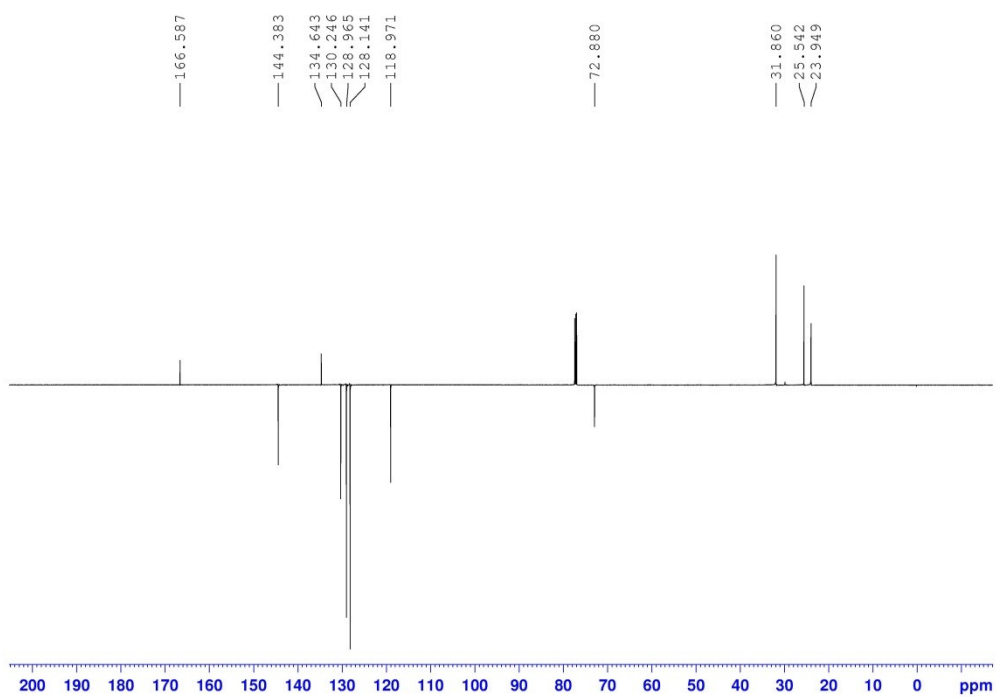

<sup>13</sup>C NMR of compound **12**

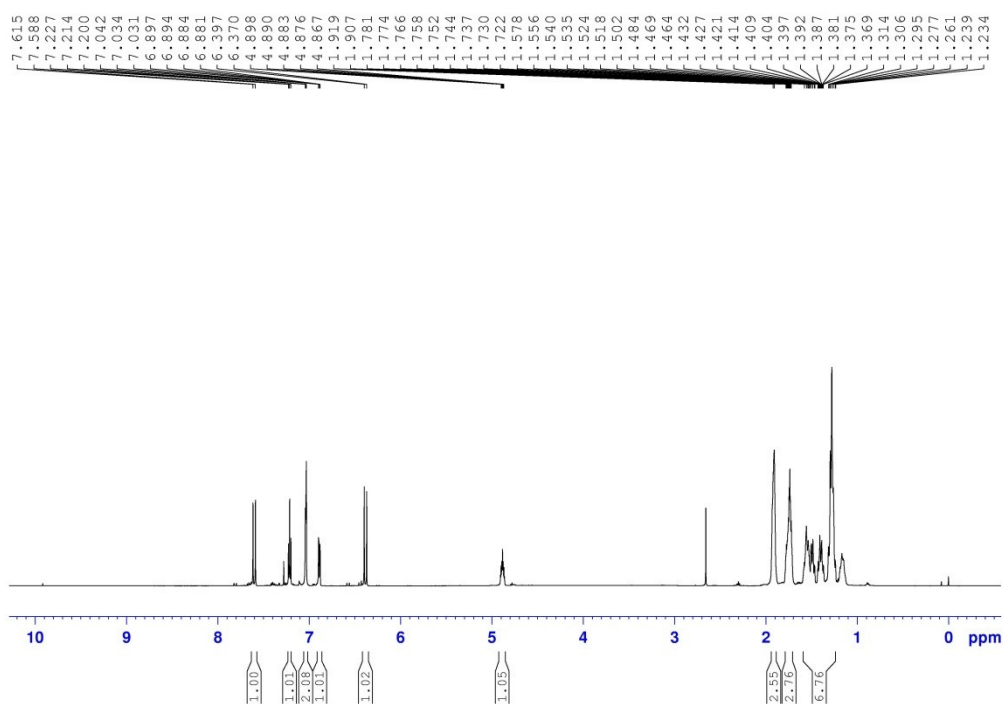

<sup>1</sup>H NMR of compound 13

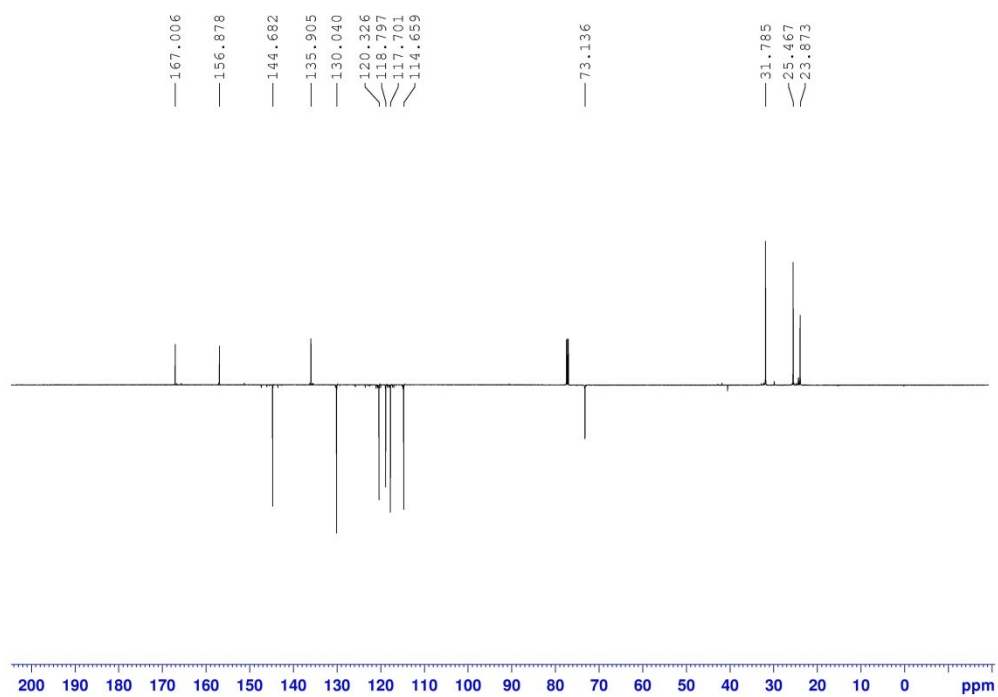

<sup>13</sup>C NMR of compound 13

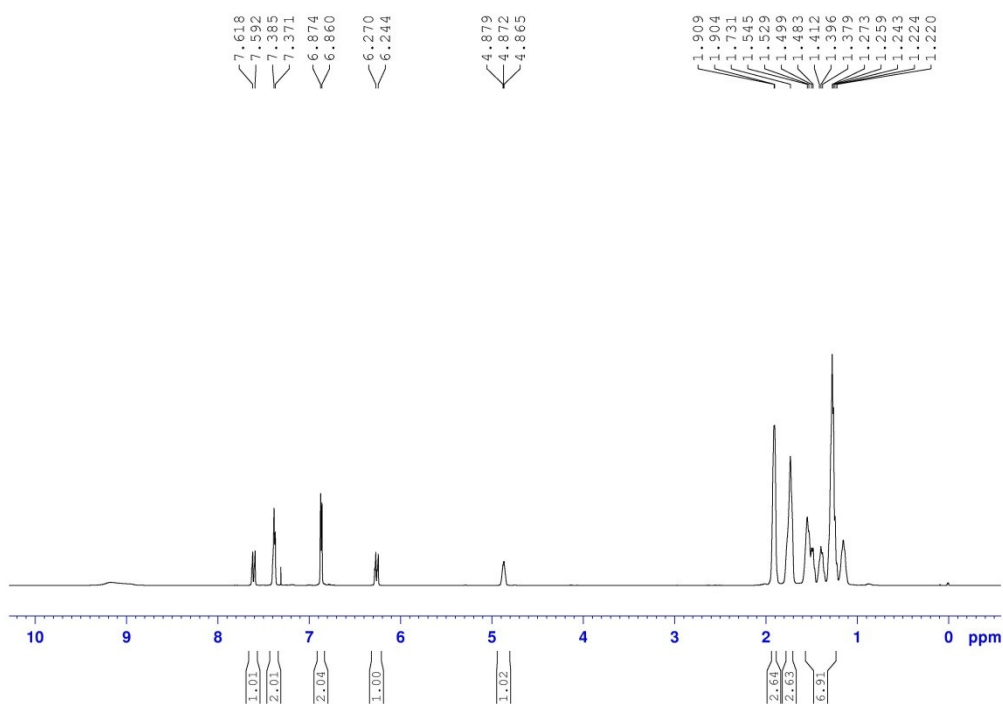

$^1\text{H}$  NMR of compound **14**

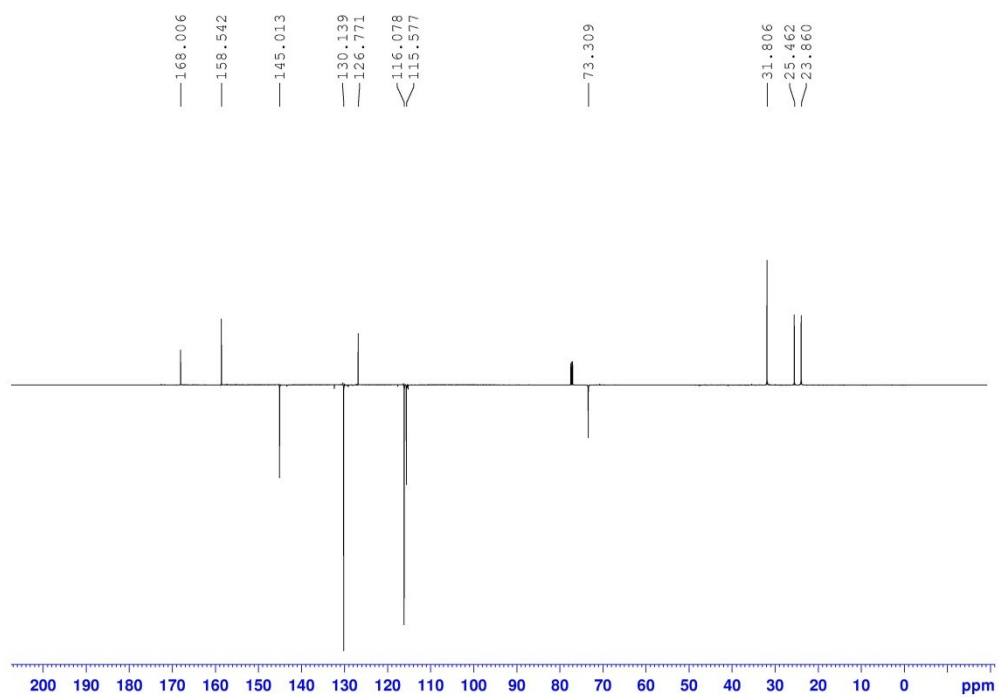

$^{13}\text{C}$  NMR of compound **14**
